# Supplementary material for: Genomic Hotspots for Adaptation: The Population Genetics of Müllerian Mimicry in the Heliconius melpomene Clade
Source: PLOS journal article supplement (doi:10.1371/journal.pgen.1000794), 2010-02-04

a) All sites

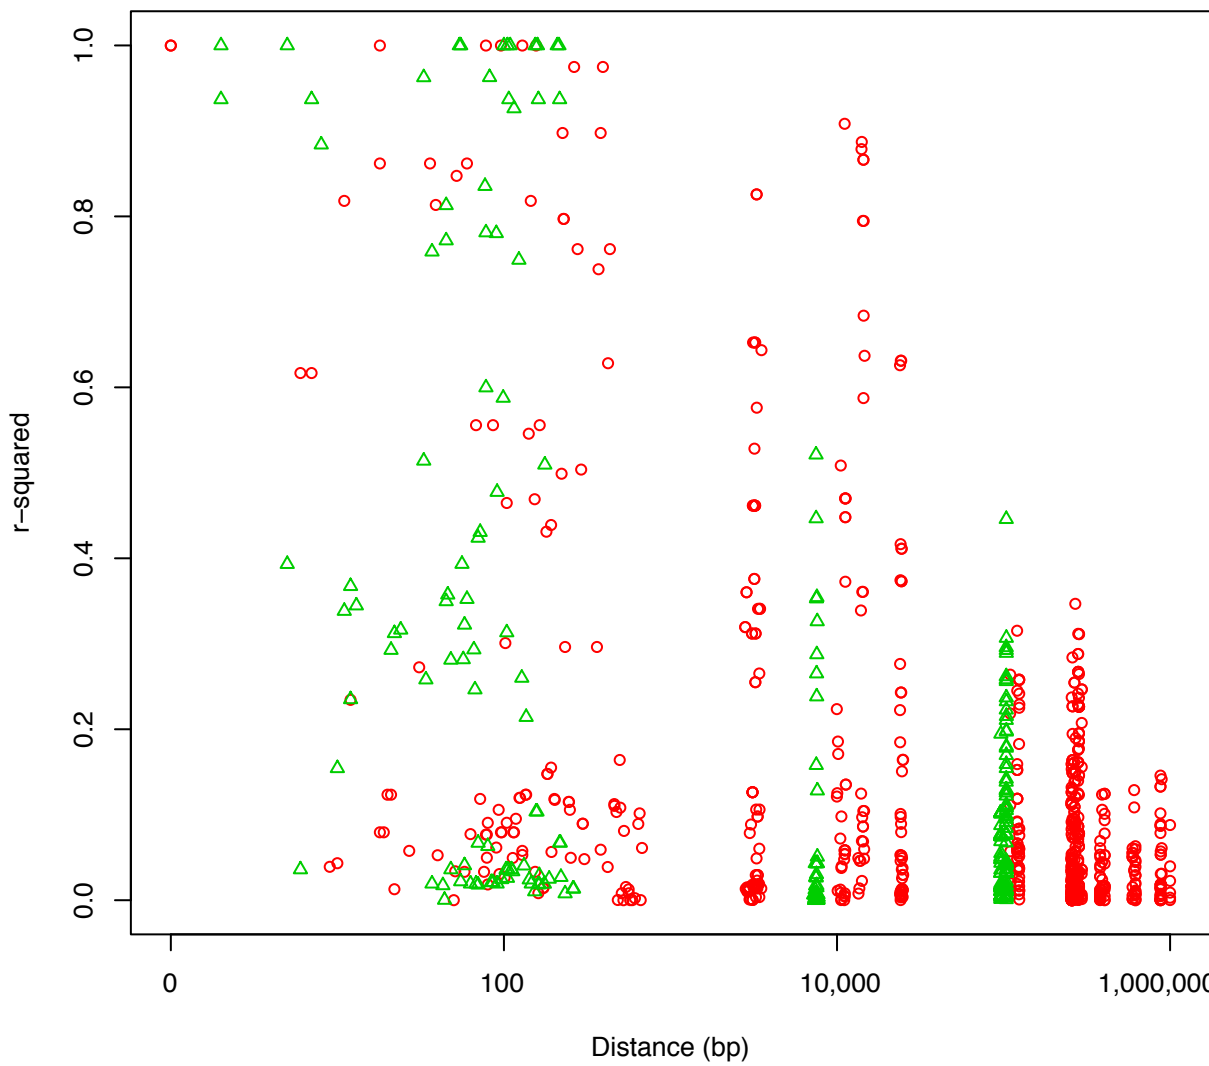

b) Excluding sites associated with phenotype

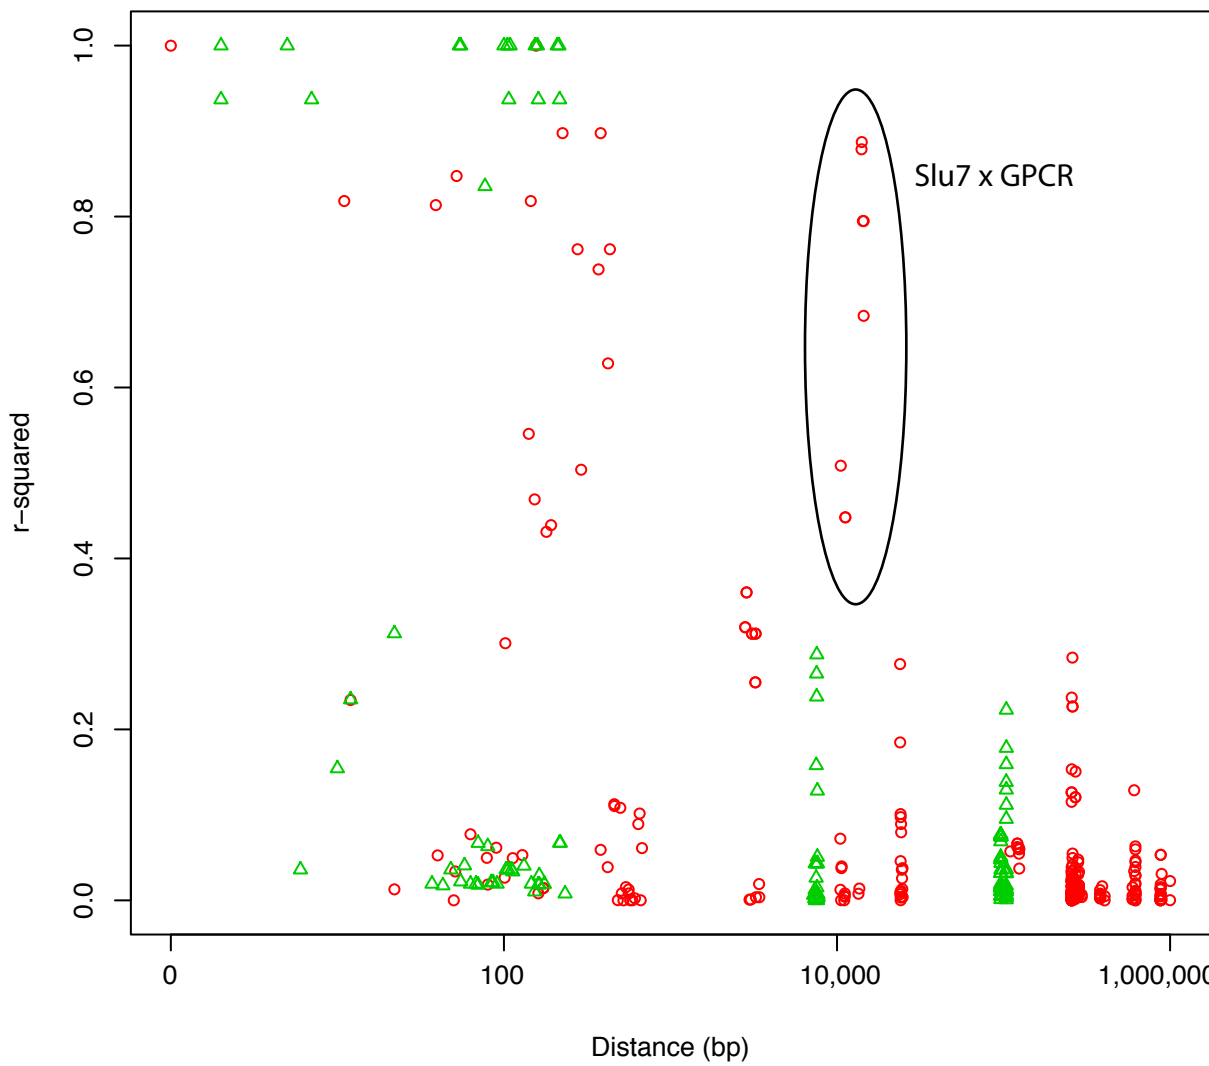

Supplement: S2 (10.1371/journal.pgen.1000794.s002) [file journal.pgen.1000794.s002]
